# Supplementary material
Source: PubMed Central journal article supplement (PMC6379059)
Supplement: NIHMS81554-supplement-Supplement.pdf [file NIHMS81554-supplement-Supplement.pdf]

## Supplementary Materials for

### **A dose-dependent plasma signature of the safety and immunogenicity of the rVSV-Ebola vaccine in Europe and Africa**

Angela Huttner, Christophe Combescure, Stéphane Grillet, Mariëlle C. Haks, Edwin Quinten, Christine Modoux, Selidji Todagbe Agnandji, Jessica Brosnahan, Julie-Anne Dayer, Ali M. Harandi, Laurent Kaiser, Donata Medaglini, Tom Monath, VEBCON and VSV-EBOVAC Consortia, Pascale Roux-Lombard, Peter G. Kremsner, Tom H. M. Ottenhoff, Claire-Anne Siegrist\*

\*Corresponding author. Email: [claire-anne.siegrist@unige.ch](mailto:claire-anne.siegrist@unige.ch)

Published 12 April 2017, *Sci. Transl. Med.* **9**, eaaj1701 (2017)

DOI: 10.1126/scitranslmed.aaj1701

#### **This PDF file includes:**

Determination of the dose independence of the signature's equation

Fig. S1. Study flow chart.

Fig. S2. The plasma signature of responses to rVSV-ZEBOV in Geneva vaccinees.

Fig. S3. Associations between the plasma signature and IgG titers to EBOV-GP.

Fig. S4. Relative gene expression levels and fold change in gene expression levels (compared to day 0) for cytokines and chemokines comprising the plasma signature in Geneva participants.

Fig. S5. The plasma signature of responses to rVSV-ZEBOV defined by the Lambaréné data.

Fig. S6. The Geneva plasma signature of responses to rVSV-ZEBOV applied to Lambaréné vaccinees.

Fig. S7. The Geneva signature applied to HD vaccinees with or without arthritis in Geneva and Lambaréné.

Table S1. Plasma cytokines and chemokines with no significant change after rVSV-ZEBOV immunization in Geneva.

Table S2. Daily ratio of GMCs (compared to day 0) for up-regulated plasma cytokines and chemokines in Geneva participants.

Table S3. Spearman's correlation coefficients between cytokines/chemokines (Geneva).

Table S4. Spearman's correlation coefficients between the day 1/day 0 ratios in Geneva participants.

Table S5. Associations between the rVSV-ZEBOV plasma signature and other AEs in Geneva participants.

Table S6. Association between the rVSV-ZEBOV plasma signature and the severity of AEs in Geneva participants.

Table S7. Ratio of GMCs for individual chemokines/cytokines in HD Geneva vaccinees.

Table S8. Fold change in gene expression levels (compared to day 0) for cytokines and chemokines comprising the plasma signature in Geneva participants.

Table S9. GMCs of up-regulated plasma markers in Lambaréné.

Table S10. Comparison of baseline GMCs in Lambaréné and Geneva participants.

Table S11. Daily ratio of GMCs (compared to day 0) for up-regulated plasma cytokines and chemokines in Lambaréné vaccinees.

Table S12. Plasma cytokines and chemokines with no significant biological change after rVSV-ZEBOV immunization in Lambaréné.

Table S13. Comparison of vaccine responses (day 1/day 0 ratios) between Geneva and Lambaréné vaccinees.

Table S14. Correlations between signatures and biological outcomes in Lambaréné vaccinees.

Table S15. Comparative frequencies of AEs in Geneva and Lambaréné vaccinees.

Table S16. Associations between the Geneva plasma signature and the severity of AEs in Lambaréné vaccinees.

### **Determination of the dose independence of the signature's equation**

To define whether this signature was dependent or independent of the vaccine dose, it was next calculated in each dose group.

#### **Signature assessed in low-dose vaccinees only**

The ratio of cytokines/chemokines introduced in the equation was also standardized. This standardization involves the mean and standard deviation of each ratio in Geneva samples:

$$\text{IL1-Ra}^{\text{STD-LD}} = [\log_{10}(\text{IL-1Ra}^{\text{Day 1}} / \text{IL-1Ra}^{\text{Day 0}}) - 0.245] / 0.413$$

$$\text{IL-6}^{\text{STD-LD}} = [\log_{10}(\text{IL-6}^{\text{Day 1}} / \text{IL-6}^{\text{Day 0}}) - 0.203] / 0.387$$

$$\text{TNF-}\alpha^{\text{STD-LD}} = [\log_{10}(\text{TNF}\alpha^{\text{Day 1}} / \text{TNF}\alpha^{\text{Day 0}}) - 0.060] / 0.326$$

$$\text{IL-10}^{\text{STD-LD}} = [\log_{10}(\text{IL-10}^{\text{Day 1}} / \text{IL-10}^{\text{Day 0}}) - 0.192] / 0.604$$

$$\text{MCP-1}^{\text{STD-LD}} = [\log_{10}(\text{MCP-1}^{\text{Day 1}} / \text{MCP-1}^{\text{Day 0}}) - 0.148] / 0.231$$

The eigen values for the components were 3.29, 0.86, 0.37, 0.31 and 0.17. The single component with the eigen value greater than 1 was therefore retained. This component explained 66% of the variability of the ratios.

The equation of this principal component was:

$$0.459 * \text{MCP-1}^{\text{STD-LD}} + 0.464 * \text{IL-1Ra}^{\text{STD-LD}} + 0.410 * \text{TNF}\alpha^{\text{STD-LD}} + 0.457 * \text{IL-10}^{\text{STD-LD}} + 0.464 * \text{IL-6}^{\text{STD-LD}}$$

The standard deviation of the signature in vaccinees was 1.81 (and the mean was 0). The coefficient in the equation was then divided by 1.81 so that the standard deviation of the signature equals 1. Thus, the final equation for the signature was:

**Signature =**

$$0.253 * \text{MCP-1}^{\text{STD-LD}} + 0.245 * \text{IL-1Ra}^{\text{STD-LD}} + 0.226 * \text{TNF-}\alpha^{\text{STD-LD}} + 0.252 * \text{IL-10}^{\text{STD-LD}} + 0.256 * \text{IL-6}^{\text{STD-LD}}$$

**The signature obtained in low-dose vaccinees was similar.**

*The Kaiser-Meyer-Olkin measure was assessed to check the adequacy of our model. The obtained values were: 0.72 for IL-1Ra, 0.81 for IL-6, 0.78 for TNF- $\alpha$ , 0.87 for IL-10 and 0.70 for MCP-1; the overall measure of adequacy was 0.77. We concluded that our model was adequate.*

#### **Signature assessed in high-dose vaccinees only**

The ratio of cytokines/chemokines introduced in the equation was also standardized. This standardization involves the mean and standard deviation of each ratio in Geneva samples:

$$\text{IL1-Ra}^{\text{STD-HD}} = [\log_{10}(\text{IL-1Ra}^{\text{Day 1}} / \text{IL-1Ra}^{\text{Day 0}}) - 1.026] / 0.403$$

$$\text{IL-6}^{\text{STD-HD}} = [\log_{10}(\text{IL-6}^{\text{Day 1}} / \text{IL-6}^{\text{Day 0}}) - 0.626] / 0.505$$

$$\text{TNF-}\alpha^{\text{STD-HD}} = [\log_{10}(\text{TNF}\alpha^{\text{Day 1}} / \text{TNF}\alpha^{\text{Day 0}}) - 0.337] / 0.317$$

$$\text{IL-10}^{\text{STD-HD}} = [\log_{10}(\text{IL-10}^{\text{Day 1}} / \text{IL-10}^{\text{Day 0}}) - 0.618] / 0.560$$

$$\text{MCP-1}^{\text{STD-HD}} = [\log_{10}(\text{MCP-1}^{\text{Day 1}} / \text{MCP-1}^{\text{Day 0}}) - 0.525] / 0.243$$

The eigen values for the components were 3.15, 0.65, 0.61, 0.43 and 0.16. The single component with the eigen value greater than 1 was therefore retained. This component explained 63% of the variability of the ratios.

The equation of this principal component was:

$$0.511 * \text{MCP-1}^{\text{STD-HD}} + 0.468 * \text{IL-1Ra}^{\text{STD-HD}} + 0.390 * \text{TNF}\alpha^{\text{STD-HD}} + 0.421 * \text{IL-10}^{\text{STD-HD}} + 0.437 * \text{IL-6}^{\text{STD-HD}}$$

The standard deviation of the signature in vaccinees was 1.77 (and the mean was 0). The coefficient in the equation was then divided by 1.77 so that the standard deviation of the signature equals 1. Thus, the final equation for the signature was:

**Signature =**

$$0.288 * \text{MCP-1}^{\text{STD-HD}} + 0.264 * \text{IL-1Ra}^{\text{STD-HD}} + 0.220 * \text{TNF-}\alpha^{\text{STD-HD}} + 0.237 * \text{IL-10}^{\text{STD-HD}} + 0.246 * \text{IL-6}^{\text{STD-HD}}$$

**The signature obtained in high-dose vaccinees was similar.**

*The Kaiser-Meyer-Olkin measure was assessed to check the adequacy of our model. The obtained values were: 0.70 for IL-1Ra, 0.84 for IL-6, 0.85 for TNF- $\alpha$ , 0.74 for IL-10 and 0.68 for MCP-1; the overall measure of adequacy was 0.74. We concluded that our model was adequate.*

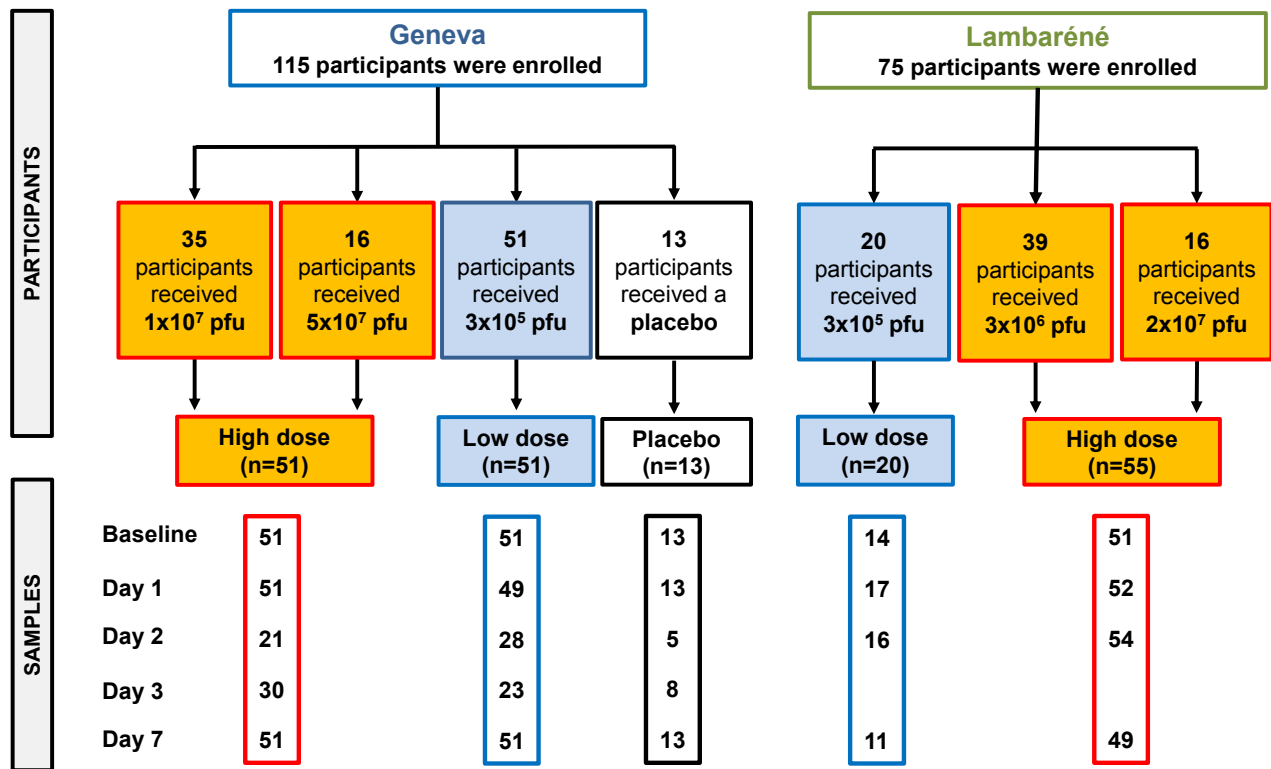

**Figure S1. Study flow chart.**

Flow diagram of the distribution of participants enrolled in the Geneva RCT and in the Lambaréné dose-escalation trials. The number of samples indicates samples available for/included in the analyses. In Geneva, the day 3 visit was scheduled on day 2 or 3, allowing comparison of the early kinetics of chemokines/cytokines. In Lambaréné, cytokine responses to  $3 \times 10^6$  and  $2 \times 10^7$  pfu were similar, such that these two groups of vaccinees were pooled into a “high-dose” group.

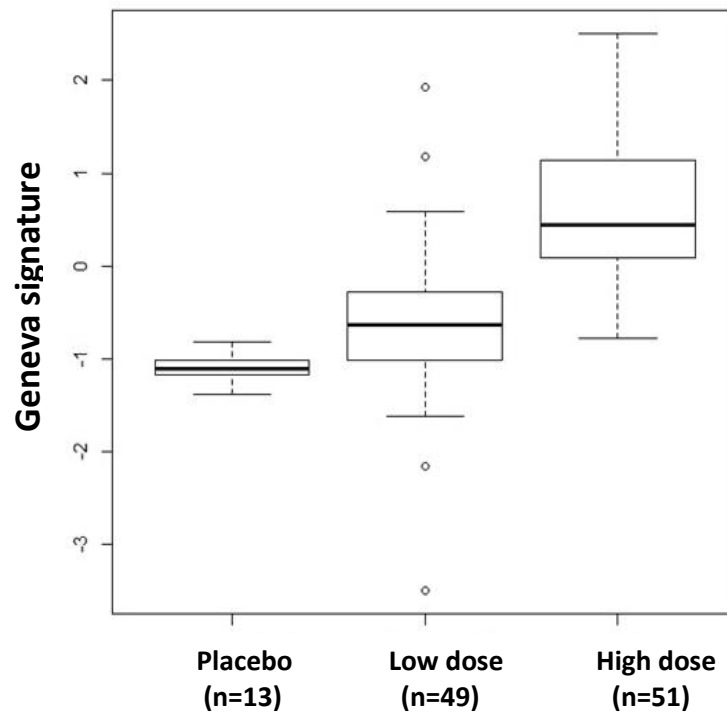

**Figure S2. The plasma signature of responses to rVSV-ZEBOV in Geneva vaccinees.**

This represents the signature (in arbitrary units) calculated in placebo, low-dose and high-dose vaccine recipients.

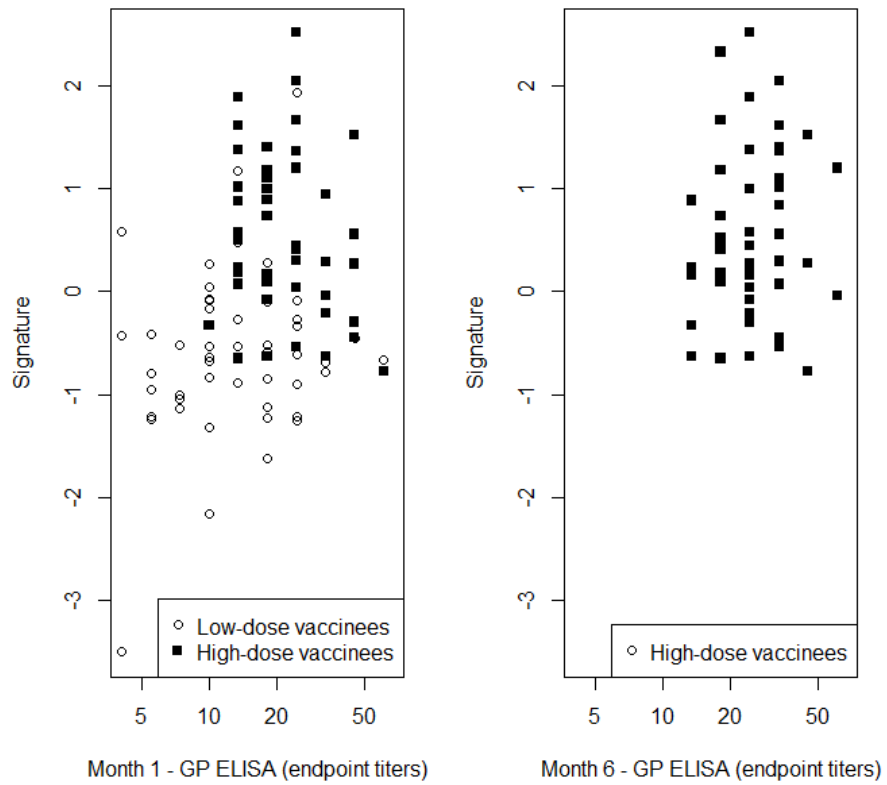

**Figure S3. Associations between the plasma signature and IgG titers to EBOV-GP.**

IgG antibodies to EBOV-GP had been assessed by GP-specific ELISA one month (left) and 6 months (right) following rVSV-ZEBOV immunization, as previously described (5). At month 6, only samples from high-dose Geneva vaccinees (n=51) were included.

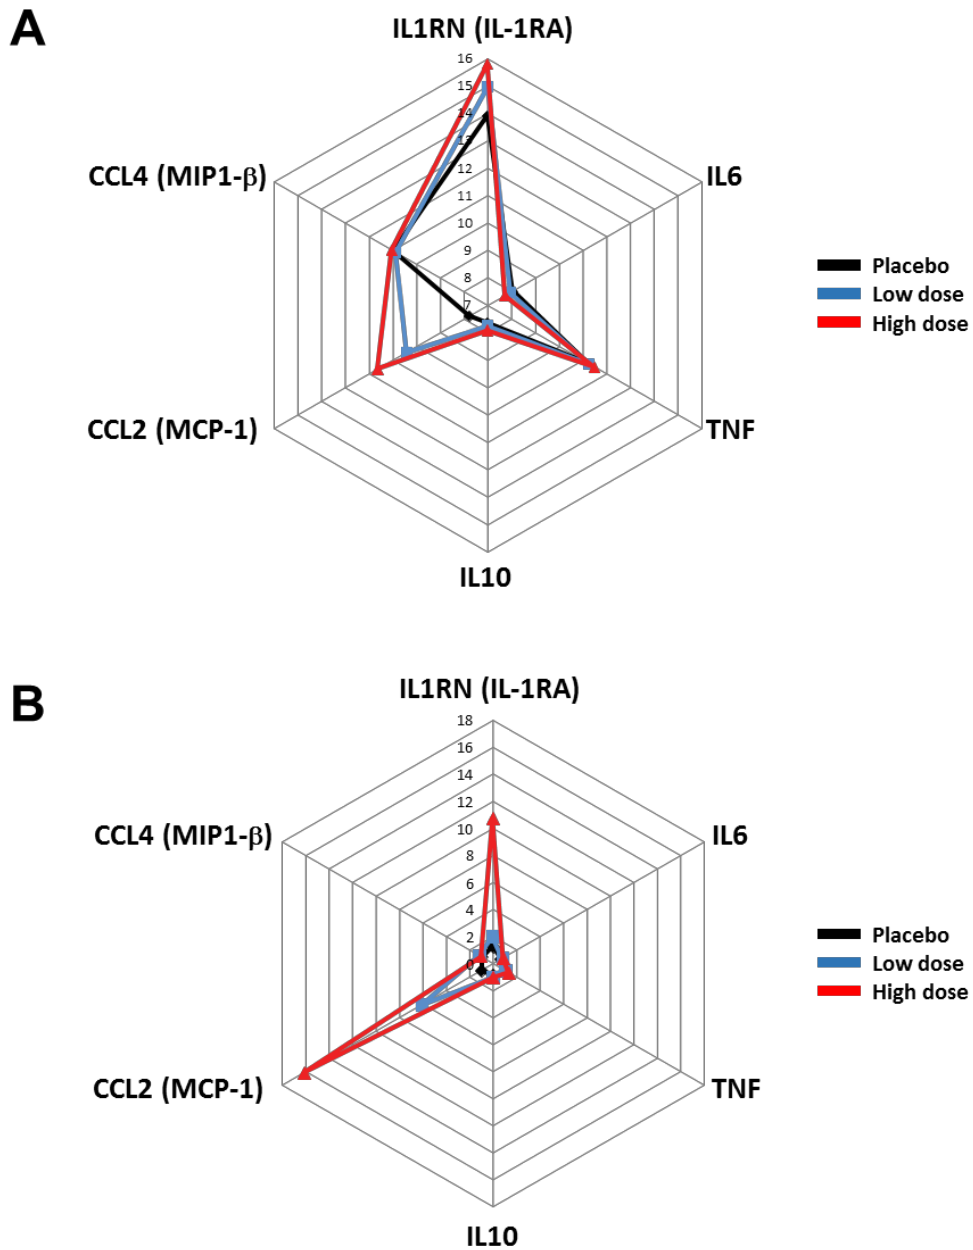

**Figure S4. Relative gene expression levels and fold change in gene expression levels (compared to day 0) for cytokines and chemokines comprising the plasma signature in Geneva participants.**

- A. Relative gene expression levels (log<sub>2</sub>) of the markers comprising the plasma signature in Geneva participants.
- B. Vaccine responses, expressed by the day 1/day 0 fold changes, are illustrated for the markers comprising the plasma signature in Geneva participants.



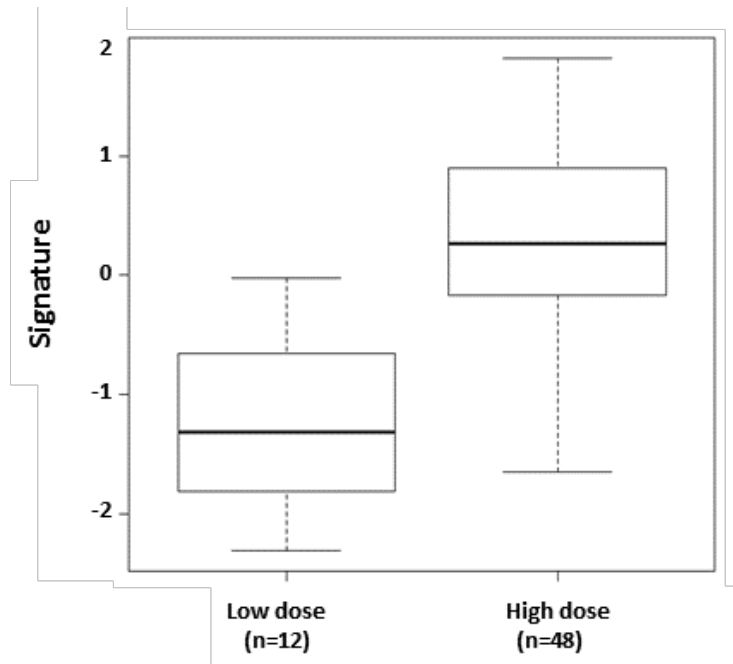

**Figure S5. The plasma signature of responses to rVSV-ZEBOV defined by the Lambaréné data.**  
This represents the signature (in arbitrary units) calculated in low-dose and high-dose vaccine recipients.

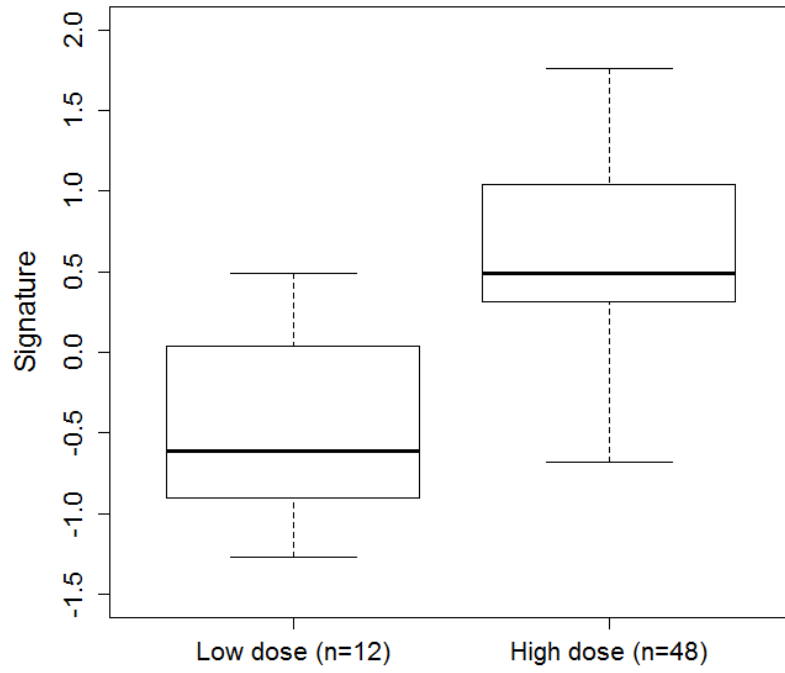

**Figure S6. The Geneva plasma signature of responses to rVSV-ZEBOV applied to Lambaréné vaccinees.** This represents the signature (in arbitrary units) calculated in low-dose and high-dose vaccine recipients.

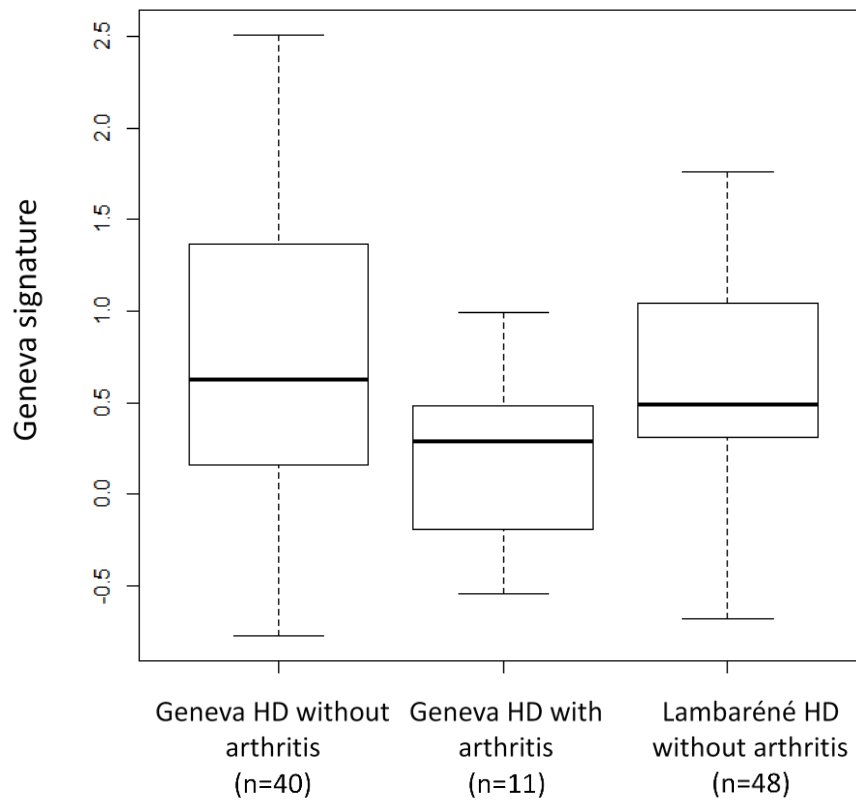

**Figure S7. The Geneva signature applied to HD vaccinees with or without arthritis in Geneva and Lambaréné.**

This represents the signature (in arbitrary units) calculated in the indicated groups of vaccinees.

**Table S1. Plasma cytokines and chemokines with no significant change after rVSV-ZEBOV immunization in Geneva.**

| Markers*                        | Placebo     |    | Low dose (3x10 <sup>5</sup> ) |    | High dose (10 <sup>7</sup> or 5x10 <sup>7</sup> ) |    | P values for comparison between dose groups ANOVA with Post-hoc Scheffe |        |         |         |          |
|---------------------------------|-------------|----|-------------------------------|----|---------------------------------------------------|----|-------------------------------------------------------------------------|--------|---------|---------|----------|
|                                 | Days        | N  | GMC (95%CI)                   | N  | GMC (95%CI)                                       | N  | GMC (95%CI)                                                             | Global | P vs LD | P vs HD | LD vs HD |
| <i>MIP-1<math>\alpha</math></i> | 0           | 13 | 0.02 (0.01 to 0.07)           | 51 | 0.02 (0.01 to 0.03)                               | 51 | 0.01 (0.01 to 0.02)                                                     | .66    | >.99    | .83     | .70      |
|                                 | 1           | 13 | 0.02 (0.01 to 0.07)           | 51 | 0.02 (0.01 to 0.04)                               | 51 | 0.02 (0.01 to 0.03)                                                     | .91    | >.99    | .96     | .92      |
|                                 | 2           | 5  | 0.01 (0.01 to 0.01)           | 26 | 0.02 (0.01 to 0.05)                               | 21 | 0.02 (0.01 to 0.03)                                                     | .78    | .81     | .92     | .92      |
|                                 | 3           | 8  | 0.03 (0.00 to 0.27)           | 25 | 0.01 (0.01 to 0.03)                               | 30 | 0.01 (0.01 to 0.02)                                                     | .51    | .59     | .52     | .99      |
|                                 | 7           | 13 | 0.02 (0.01 to 0.08)           | 51 | 0.01 (0.01 to 0.02)                               | 51 | 0.01 (0.01 to 0.02)                                                     | .40    | .45     | .43     | >.99     |
|                                 | <b>P **</b> |    | .43                           |    | .28                                               |    | .55                                                                     |        |         |         |          |
| <i>CXCL5</i>                    | 0           | 13 | 743.42<br>(578.15 to 955.95)  | 51 | 965.27<br>(800.93 to 1163.33)                     | 51 | 909.46<br>(767.78 to 1077.28)                                           | .42    | .42     | .59     | .89      |
|                                 | 1           | 13 | 619.18<br>(453.17 to 845.99)  | 49 | 750.47<br>(609.63 to 923.84)                      | 51 | 824.53<br>(697.05 to 975.34)                                            | .37    | .66     | .39     | .78      |
|                                 | 2           | 5  | 696.76<br>(367.44 to 1321.26) | 28 | 897.62<br>(700.62 to 1150.01)                     | 21 | 760.31<br>(552.34 to 1046.58)                                           | .62    | .76     | .97     | .72      |
|                                 | 3           | 8  | 578.09<br>(423.75 to 788.63)  | 23 | 682.17<br>(562.18 to 827.77)                      | 30 | 719.8<br>(577.44 to 897.26)                                             | .60    | .76     | .60     | .94      |
|                                 | 7           | 13 | 691.24<br>(512.9 to 931.58)   | 51 | 750.63<br>(618.46 to 911.06)                      | 51 | 678.28<br>(558.15 to 824.27)                                            | .75    | .93     | >.99    | .76      |
|                                 | <b>P **</b> |    | .49                           |    | .018                                              |    | .002                                                                    |        |         |         |          |
| <i>IL1-<math>\beta</math></i>   | 0           | 13 | 0.02 (0.01 to 0.03)           | 51 | 0.02 (0.01 to 0.03)                               | 51 | 0.01 (0.01 to 0.02)                                                     | .51    | >.99    | .77     | .56      |
|                                 | 1           | 13 | 0.02 (0.01 to 0.04)           | 51 | 0.03 (0.02 to 0.04)                               | 51 | 0.02 (0.01 to 0.02)                                                     | .32    | .86     | .92     | .32      |
|                                 | 2           | 5  | 0.01 (0.01 to 0.03)           | 27 | 0.02 (0.01 to 0.05)                               | 21 | 0.02 (0.01 to 0.04)                                                     | .68    | .72     | .89     | .87      |
|                                 | 3           | 8  | 0.01 (0.01 to 0.03)           | 24 | 0.02 (0.01 to 0.03)                               | 30 | 0.02 (0.01 to 0.03)                                                     | .87    | .98     | .89     | .93      |
|                                 | 7           | 13 | 0.02 (0.01 to 0.05)           | 51 | 0.02 (0.01 to 0.02)                               | 50 | 0.02 (0.01 to 0.02)                                                     | .56    | .79     | .57     | .84      |
|                                 | <b>P **</b> |    | .30                           |    | .21                                               |    | .38                                                                     |        |         |         |          |
| <i>IL-8</i>                     | 0           | 13 | 4.53 (3.62 to 5.67)           | 51 | 3.54 (2.71 to 4.61)                               | 51 | 3.90 (3.32 to 4.58)                                                     | .55    | .58     | .82     | .81      |
|                                 | 1           | 13 | 4.62 (3.40 to 6.27)           | 49 | 2.81 (2.08 to 3.79)                               | 51 | 4.05 (3.37 to 4.86)                                                     | .054   | .18     | .89     | .11      |
|                                 | 2           | 5  | 4.89 (2.17 to 11.04)          | 28 | 3.46 (2.61 to 4.60)                               | 21 | 5.67 (4.47 to 7.19)                                                     | .059   | .61     | .92     | .063     |

| Markers*      |   |             | Placebo             | Low dose (3x10 <sup>5</sup> ) |                     |       | High dose (10 <sup>7</sup> or 5x10 <sup>7</sup> ) | P values for comparison between dose groups ANOVA with Post-hoc Scheffe |      |      |      |
|---------------|---|-------------|---------------------|-------------------------------|---------------------|-------|---------------------------------------------------|-------------------------------------------------------------------------|------|------|------|
|               |   |             |                     |                               |                     |       |                                                   |                                                                         |      |      |      |
|               | 3 | 8           | 3.31 (2.11 to 5.18) | 23                            | 4.90 (3.72 to 6.44) | 30    | 4.90 (4.05 to 5.94)                               | .24                                                                     | .29  | .27  | 1    |
|               | 7 | 13          | 4.36 (3.17 to 5.99) | 51                            | 3.49 (2.58 to 4.71) | 51    | 3.94 (3.28 to 4.74)                               | .64                                                                     | .72  | .94  | .78  |
|               |   | <b>P **</b> | .30                 |                               | .034                |       | <.001                                             |                                                                         |      |      |      |
| <b>G-CSF</b>  | 0 | 13          | 0.73 (0.14 to 3.82) | 51                            | 0.29 (0.12 to 0.71) | 51    | 0.21 (0.1 to 0.47)                                | .44                                                                     | .63  | .44  | .89  |
|               | 1 | 13          | 1.31 (0.28 to 6.12) | 49                            | 0.53 (0.22 to 1.28) | 51    | 0.35 (0.15 to 0.84)                               | .39                                                                     | .65  | .40  | .80  |
|               | 2 | 5           | 0.91 (0.09 to 8.79) | 28                            | 0.63 (0.20 to 1.96) | 21    | 0.69 (0.22 to 2.15)                               | .96                                                                     | .97  | .98  | .99  |
|               | 3 | 8           | 0.02 (0.02 to 1.86) | 23                            | 5.02 (2.65 to 9.48) | 30    | 2.17 (0.76 to 6.18)                               | .012                                                                    | .011 | .067 | .50  |
|               | 7 | 13          | 0.33 (0.06 to 1.75) | 51                            | 1.00 (0.44 to 2.26) | 51    | 0.91 (0.41 to 1.99)                               | .47                                                                     | .49  | .55  | .99  |
|               |   |             | <b>P **</b>         | .098                          |                     | <.001 |                                                   | <.001                                                                   |      |      |      |
| <b>GM-CSF</b> | 0 | 13          | 0.02 (0.01 to 0.03) | 51                            | 0.03 (0.02 to 0.05) | 51    | 0.01 (0.01 to 0.02)                               | <.001                                                                   | .23  | .74  | .001 |
|               | 1 | 13          | 0.02 (0.01 to 0.03) | 49                            | 0.02 (0.01 to 0.03) | 51    | 0.02 (0.01 to 0.02)                               | .60                                                                     | .79  | >.99 | .65  |
|               | 2 | 5           | 0.02 (0.00 to 0.10) | 28                            | 0.02 (0.01 to 0.03) | 21    | 0.01 (0.01 to 0.02)                               | .62                                                                     | .93  | .72  | .74  |
|               | 3 | 8           | 0.02 (0.01 to 0.06) | 23                            | 0.03 (0.02 to 0.06) | 30    | 0.01 (0.01 to 0.02)                               | .15                                                                     | .87  | .71  | .15  |
|               | 7 | 13          | 0.02 (0.01 to 0.06) | 51                            | 0.02 (0.01 to 0.03) | 51    | 0.02 (0.01 to 0.02)                               | .42                                                                     | .99  | .78  | .44  |
|               |   |             | <b>P **</b>         | .72                           |                     | .036  |                                                   | .31                                                                     |      |      |      |

\* Expressed in pg/m. IFN- $\gamma$ , IL-2, IL-4 and IL-17 remained below detection levels in all samples at all time points and are not depicted.

\*\* : Linear regression models with mixed effects were used to test the equality of geometric mean across days.

**Table S2. Daily ratio of GMCs (compared to day 0) for up-regulated plasma cytokines and chemokines in Geneva participants.**

|                                        | Placebo |                                     |             | Low dose                            |                 | High dose                         |                 |
|----------------------------------------|---------|-------------------------------------|-------------|-------------------------------------|-----------------|-----------------------------------|-----------------|
|                                        | Days    | Ratio of GMC<br>(compared to day 0) | <i>P</i> *  | Ratio of GMC (compared<br>to day 0) | <i>P</i> *      | Ratio of GMC<br>compared to day 0 | <i>P</i> *      |
| <b><i>IL-1R<math>\alpha</math></i></b> | 0       | 1                                   |             | 1                                   |                 | 1                                 |                 |
|                                        | 1       | 0.97 (0.78 to 1.21)                 | .81         | 1.77 (1.39 to 2.26)                 | <b>&lt;.001</b> | 10.61 (8.41 to 13.37)             | <b>&lt;.001</b> |
|                                        | 2       | 0.70 (0.51 to 0.95)                 | <b>.030</b> | 2.36 (1.76 to 3.16)                 | <b>&lt;.001</b> | 2.66 (1.94 to 3.64)               | <b>&lt;.001</b> |
|                                        | 3       | 0.85 (0.65 to 1.10)                 | .21         | 1.27 (0.93 to 1.74)                 | .13             | 1.40 (1.06 to 1.84)               | <b>.019</b>     |
|                                        | 7       | 0.90 (0.73 to 1.12)                 | .37         | 1.19 (0.93 to 1.51)                 | .17             | 1.20 (0.95 to 1.51)               | .13             |
| <b><i>IL-6</i></b>                     | 0       | 1                                   |             | 1                                   |                 | 1                                 |                 |
|                                        | 1       | 0.70 (0.35 to 1.38)                 | .31         | 1.82 (1.18 to 2.79)                 | <b>.007</b>     | 13.48 (8.29 to 21.91)             | <b>&lt;.001</b> |
|                                        | 2       | 0.72 (0.27 to 1.93)                 | .52         | 1.26 (0.74 to 2.12)                 | .40             | 1.31 (0.67 to 2.57)               | .43             |
|                                        | 3       | 0.56 (0.25 to 1.28)                 | .18         | 0.76 (0.43 to 1.35)                 | .35             | 1.13 (0.62 to 2.04)               | .69             |
|                                        | 7       | 0.44 (0.22 to 0.88)                 | <b>.026</b> | 0.74 (0.49 to 1.14)                 | .17             | 0.82 (0.51 to 1.34)               | .44             |
| <b><i>TNF<math>\alpha</math></i></b>   | 0       | 1                                   |             | 1                                   |                 | 1                                 |                 |
|                                        | 1       | 1.30 (0.59 to 2.87)                 | .51         | 1.33 (0.78 to 2.27)                 | .30             | 3.98 (2.43 to 6.51)               | <b>&lt;.001</b> |
|                                        | 2       | 0.40 (0.13 to 1.22)                 | .12         | 2.30 (1.19 to 4.43)                 | <b>.014</b>     | 4.31 (2.18 to 8.53)               | <b>&lt;.001</b> |
|                                        | 3       | 0.66 (0.26 to 1.68)                 | .39         | 1.10 (0.54 to 2.23)                 | .80             | 2.92 (1.62 to 5.29)               | <b>&lt;.001</b> |
|                                        | 7       | 1.46 (0.66 to 3.20)                 | .36         | 1.01 (0.60 to 1.72)                 | .97             | 2.06 (1.26 to 3.38)               | <b>.005</b>     |
| <b><i>IL-10</i></b>                    | 0       | 1                                   |             | 1                                   |                 | 1                                 |                 |
|                                        | 1       | 0.74 (0.39 to 1.38)                 | .35         | 2.11 (1.19 to 3.75)                 | <b>.011</b>     | 7.08 (4.68 to 10.70)              | <b>&lt;.001</b> |
|                                        | 2       | 0.28 (0.12 to 0.70)                 | <b>.010</b> | 2.17 (1.08 to 4.34)                 | <b>.030</b>     | 2.52 (1.42 to 4.46)               | <b>.002</b>     |
|                                        | 3       | 0.66 (0.31 to 1.39)                 | .28         | 1.29 (0.61 to 2.72)                 | .51             | 1.15 (0.70 to 1.89)               | .59             |
|                                        | 7       | 0.65 (0.34 to 1.21)                 | .18         | 0.78 (0.44 to 1.38)                 | .40             | 1.10 (0.73 to 1.66)               | .66             |
| <b><i>MCP-1</i></b>                    | 0       | 1                                   |             | 1                                   |                 | 1                                 |                 |
|                                        | 1       | 0.89 (0.78 to 1.02)                 | .11         | 1.40 (1.22 to 1.62)                 | <b>&lt;.001</b> | 3.35 (2.97 to 3.78)               | <b>&lt;.001</b> |
|                                        | 2       | 0.86 (0.71 to 1.05)                 | .14         | 1.29 (1.09 to 1.54)                 | <b>.004</b>     | 1.35 (1.14 to 1.59)               | <b>&lt;.001</b> |
|                                        | 3       | 0.95 (0.81 to 1.12)                 | .56         | 1.00 (0.84 to 1.20)                 | >.99            | 1.13 (0.98 to 1.31)               | .092            |
|                                        | 7       | 0.94 (0.82 to 1.08)                 | .38         | 1.05 (0.92 to 1.21)                 | .48             | 1.06 (0.94 to 1.20)               | .34             |

| <i>MIP1-β</i> | 0 | 1                    |     | 1                   |                 | 1                   |                 |
|---------------|---|----------------------|-----|---------------------|-----------------|---------------------|-----------------|
| 1             |   | 0.96 (0.81 to 1.149) | .64 | 1.33 (1.14 to 1.55) | <b>&lt;.001</b> | 2.31 (2.09 to 2.56) | <b>&lt;.001</b> |
| 2             |   | 0.94 (0.73 to 1.20)  | .61 | 1.26 (1.04 to 1.52) | <b>.020</b>     | 1.22 (1.06 to 1.41) | <b>.007</b>     |
| 3             |   | 1.14 (0.93 to 1.39)  | .22 | 0.95 (0.78 to 1.16) | .63             | 0.90 (0.80 to 1.02) | .11             |
| 7             |   | 1.15 (0.97 to 1.36)  | .12 | 0.90 (0.77 to 1.04) | .17             | 0.84 (0.76 to 0.93) | <b>&lt;.001</b> |

\* *P* values for testing the null hypothesis the equality of GMC at days 0 and 1, i.e. the ratio equals 1.

**Table S3a-c. Spearman's correlation coefficients between cytokines/chemokines (Geneva).**

Spearman correlation coefficients between the various cytokines/chemokines.

**Table S3a, Day 1**

|                |               | Day 1              |                   |                   |
|----------------|---------------|--------------------|-------------------|-------------------|
|                |               | Placebo            | Low dose          | High dose         |
| IL-1R $\alpha$ | IL-6          | 0.06 ( $P=.83$ )   | 0.47 ( $P<.001$ ) | 0.58 ( $P<.001$ ) |
|                | TNF $\alpha$  | 0.40 ( $P=.17$ )   | 0.38 ( $P=.006$ ) | 0.29 ( $P=.04$ )  |
|                | IL-10         | 0.21 ( $P=.49$ )   | 0.28 ( $P=.048$ ) | 0.45 ( $P<.001$ ) |
|                | MCP-1         | 0.18 ( $P=.57$ )   | 0.71 ( $P<.001$ ) | 0.72 ( $P<.001$ ) |
|                | MIP1 $\beta$  | -0.29 ( $P=.34$ )  | 0.53 ( $P<.001$ ) | 0.46 ( $P<.001$ ) |
| IL-6           | TNF $\alpha$  | 0.83 ( $P<.001$ )  | 0.49 ( $P<.001$ ) | 0.60 ( $P<.001$ ) |
|                | IL-10         | 0.57 ( $P=0.040$ ) | 0.61 ( $P<.001$ ) | 0.58 ( $P<.001$ ) |
|                | MCP-1         | 0.55 ( $P=.050$ )  | 0.22 ( $P=.12$ )  | 0.56 ( $P<.001$ ) |
|                | MIP1- $\beta$ | -0.19 ( $P=0.54$ ) | 0.37 ( $P=.009$ ) | 0.43 ( $P=.002$ ) |
| TNF $\alpha$   | IL-10         | 0.55 ( $P=.053$ )  | 0.65 ( $P<.001$ ) | 0.53 ( $P<.001$ ) |
|                | MCP-1         | 0.58 ( $P=.040$ )  | 0.42 ( $P=.003$ ) | 0.32 ( $P=.02$ )  |
|                | MIP1- $\beta$ | -0.14 ( $P=0.64$ ) | 0.30 ( $P=.03$ )  | 0.30 ( $P=.04$ )  |
| IL-10          | MCP-1         | 0.10 ( $P=0.74$ )  | 0.29 ( $P=.045$ ) | 0.41 ( $P=.003$ ) |
|                | MIP1- $\beta$ | -0.02 ( $P=0.94$ ) | 0.45 ( $P=.001$ ) | 0.50 ( $P<.001$ ) |
| MCP-1          | MIP1- $\beta$ | -0.07 ( $P=0.82$ ) | 0.44 ( $P=.002$ ) | 0.71 ( $P<.001$ ) |

**Table S3b, Day 2**

|                |               | Day 2             |                   |                   |
|----------------|---------------|-------------------|-------------------|-------------------|
|                |               | Placebo           | Low dose          | High dose         |
| IL-1R $\alpha$ | IL-6          | 0.34 ( $P=.58$ )  | 0.42 ( $P=.020$ ) | 0.45 ( $P=.040$ ) |
|                | TNF $\alpha$  | 0.67 ( $P=.22$ )  | 0.62 ( $P<.001$ ) | 0.23 ( $P=.32$ )  |
|                | IL-10         | -0.05 ( $P=.93$ ) | 0.42 ( $P=.030$ ) | -0.07 ( $P=.75$ ) |
|                | MCP-1         | 0.80 ( $P=.10$ )  | 0.23 ( $P=.26$ )  | 0.59 ( $P=.005$ ) |
|                | MIP1 $\beta$  | -0.10 ( $P=.87$ ) | 0.18 ( $P=.37$ )  | -0.14 ( $P=.55$ ) |
| IL-6           | TNF $\alpha$  | 0.86 ( $P=.060$ ) | 0.63 ( $P<.001$ ) | 0.33 ( $P=.15$ )  |
|                | IL-10         | 0.80 ( $P=.10$ )  | 0.35 ( $P=.070$ ) | -0.20 ( $P=.38$ ) |
|                | MCP-1         | 0.45 ( $P=.45$ )  | 0.02 ( $P=.92$ )  | 0.33 ( $P=.14$ )  |
|                | MIP1- $\beta$ | 0.78 ( $P=.12$ )  | 0.11 ( $P=.60$ )  | -0.03 ( $P=.91$ ) |



|              |               |               |               |               |
|--------------|---------------|---------------|---------------|---------------|
| TNF $\alpha$ | IL-10         | 0.63 (P=.25)  | 0.35 (P=.070) | 0.23 (P=.31)  |
|              | MCP-1         | 0.56 (P=.32)  | 0.20 (P=.32)  | 0.32 (P=.16)  |
|              | MIP1- $\beta$ | 0.67 (P=.22)  | 0.06 (P=.77)  | 0.13 (P=.56)  |
| IL-10        | MCP1          | -0.15 (P=.80) | 0.21 (P=.29)  | -0.19 (P=.42) |
|              | MIP1- $\beta$ | 0.82 (P=.090) | 0.24 (P=.24)  | -0.17 (P=.46) |
| MCP-1        | MIP1- $\beta$ | 0.00 (P=1)    | 0.08 (P=.71)  | 0.27 (P=.24)  |

**Table S3c, Day 3**

|                |               | Day 3                     |                        |                           |
|----------------|---------------|---------------------------|------------------------|---------------------------|
|                |               | Placebo                   | Low dose               | High dose                 |
| IL-1R $\alpha$ | IL-6          | 0.44 (P=.28)              | 0.19 (P=.38)           | -0.03 (P=.87)             |
|                | TNF $\alpha$  | 0.35 (P=.39)              | 0.27 (P=.21)           | 0.31 (P=.090)             |
|                | IL-10         | 0.05 (P=.91)              | 0.05 (P=.82)           | 0.26 (P=.17)              |
|                | MCP1          | 0.74 ( <b>P=.040</b> )    | 0.42 (P=.048)          | 0.65 ( <b>P&lt;.001</b> ) |
|                | MIP1 $\beta$  | 0.19 (P=.65)              | 0.30 (P=.16)           | 0.38 ( <b>P=.040</b> )    |
| IL-6           | TNF $\alpha$  | 0.97 ( <b>P&lt;.001</b> ) | 0.33 (P=.12)           | 0.57 ( <b>P=.001</b> )    |
|                | IL-10         | 0.00 (P=1)                | 0.43 ( <b>P=.040</b> ) | 0.61 ( <b>P&lt;.001</b> ) |
|                | MCP-1         | 0.74 ( <b>P=.040</b> )    | 0.18 (P=.42)           | -0.08 (P=.68)             |
|                | MIP1- $\beta$ | -0.30 (P=.47)             | -0.01 (P=.96)          | -0.04 (P=.85)             |
| TNF $\alpha$   | IL-10         | 0.00 (P=1)                | 0.44 ( <b>P=.040</b> ) | 0.46 ( <b>P=0.010</b> )   |
|                | MCP-1         | 0.79 ( <b>P=.020</b> )    | 0.51 ( <b>P=.010</b> ) | 0.11 (p=0.58)             |
|                | MIP1 $\beta$  | -0.46 (P=.25)             | 0.53 ( <b>P=.009</b> ) | 0.19 (p=0.32)             |
| IL-10          | MCP-1         | 0.15 (P=.72)              | 0.03 (P=.91)           | 0.15 (P=.42)              |
|                | MIP1 $\beta$  | -0.40 (P=.33)             | -0.09 (P=.69)          | 0.23 (P=.23)              |
| MCP-1          | MIP1- $\beta$ | -0.38 (P=.35)             | 0.31 (P=.14)           | 0.52 ( <b>P=.003</b> )    |

**Table S4. Spearman's correlation coefficients between the day 1/day 0 ratios in Geneva participants.**

Spearman correlation coefficients between the log10 of day 1/day 0 ratios.

|                |               | Day 1/day 0 ratio      |                        |                        |
|----------------|---------------|------------------------|------------------------|------------------------|
|                |               | Placebo                | Low dose               | High dose              |
| IL-1R $\alpha$ | IL-6          | -0.12 ( <i>P</i> =.69) | 0.32 ( <i>P</i> =.030) | 0.62 ( <i>P</i> <.001) |
|                | TNF $\alpha$  | -0.09 ( <i>P</i> =.78) | 0.30 ( <i>P</i> =.040) | 0.50 ( <i>P</i> <.001) |
|                | IL-10         | -0.37 ( <i>P</i> =.21) | 0.42 ( <i>P</i> =.003) | 0.44 ( <i>P</i> =.001) |
|                | MCP-1         | -0.15 ( <i>P</i> =.63) | 0.79 ( <i>P</i> <.001) | 0.74 ( <i>P</i> <.001) |
|                | MIP1- $\beta$ | -0.29 ( <i>P</i> =.34) | 0.79 ( <i>P</i> <.001) | 0.62 ( <i>P</i> <.001) |
| IL-6           | TNF $\alpha$  | -0.29 ( <i>P</i> =.33) | 0.53 ( <i>P</i> <.001) | 0.59 ( <i>P</i> <.001) |
|                | IL-10         | 0.15 ( <i>P</i> =.63)  | 0.43 ( <i>P</i> =.002) | 0.21 ( <i>p</i> =0.13) |
|                | MCP-1         | -0.09 ( <i>P</i> =.77) | 0.43 ( <i>P</i> =.002) | 0.53 ( <i>P</i> <.001) |
|                | MIP1- $\beta$ | -0.39 ( <i>P</i> =.19) | 0.36 ( <i>P</i> =.010) | 0.45 ( <i>P</i> =.001) |
| TNF $\alpha$   | IL-10         | 0.30 ( <i>P</i> =.32)  | 0.35 ( <i>P</i> =.010) | 0.33 ( <i>P</i> =.020) |
|                | MCP-1         | -0.10 ( <i>P</i> =.76) | 0.40 ( <i>P</i> =.005) | 0.56 ( <i>P</i> <.001) |
|                | MIP1- $\beta$ | 0.15 ( <i>P</i> =.61)  | 0.41 ( <i>P</i> =.003) | 0.48 ( <i>P</i> <.001) |
| IL10           | MCP-1         | -0.03 ( <i>P</i> =.93) | 0.53 ( <i>P</i> <.001) | 0.61 ( <i>P</i> <.001) |
|                | MIP1- $\beta$ | -0.28 ( <i>P</i> =.36) | 0.41 ( <i>P</i> =.003) | 0.46 ( <i>P</i> <.001) |
| MCP-1          | MIP1- $\beta$ | 0.66 ( <i>P</i> =.010) | 0.87 ( <i>P</i> <.001) | 0.84 ( <i>P</i> <.001) |

**Table S5. Associations between the rVSV-ZEBOV plasma signature and other AEs in Geneva participants.**

| Markers <sup>††</sup> |                         |                            | Difference/Ratio*      | p-value <sup>**</sup> ,<br>*** |
|-----------------------|-------------------------|----------------------------|------------------------|--------------------------------|
|                       | <b>SWELLING (n=4)</b>   | <b>NO SWELLING (n=111)</b> |                        |                                |
| <b>Signature</b>      | -0.08 (-0.97 to 0.82)   | -0.13 (-0.32 to 0.06)      | 0.05 (-1.37 to 1.47)   | 0.92                           |
| IL1-RA                | 5.36 (1.75 to 16.39)    | 3.65 (2.84 to 4.68)        | 1.47 (0.25 to 8.59)    | 0.55                           |
| IL-6                  | 6.29 (0.42 to 93.55)    | 3.94 (2.63 to 5.90)        | 1.60 (0.02 to 120.69)  | 0.76                           |
| TNF-a                 | 0.58 (0.10 to 3.37)     | 2.26 (1.61 to 3.19)        | 0.26 (0.02 to 4.20)    | 0.23                           |
| IL-10                 | 6.16 (0.85 to 44.78)    | 3.01 (2.08 to 4.34)        | 2.05 (0.09 to 48.18)   | 0.53                           |
| MCP-1                 | 1.92 (1.20 to 3.07)     | 1.98 (1.72 to 2.27)        | 0.97 (0.47 to 2.02)    | 0.92                           |
| MIP1-b                | 1.64 (1.47 to 1.83)     | 1.41 (1.05 to 1.89)        | 0.86 (0.55 to 1.35)    | 0.40                           |
|                       | <b>REDNESS (n=2)</b>    | <b>NO REDNESS (n=113)</b>  |                        |                                |
| <b>Signature</b>      | 0.08 (-2.45 to 2.60)    | -0.13 (-0.32 to 0.05)      | 0.21 (-15.77 to 16.19) | 0.90                           |
| IL1-RA                | 2.85 (0.21 to 38.83)    | 3.71 (2.91 to 4.75)        | 0.77 (0.00 to >1000)   | 0.88                           |
| IL-6                  | 12.81 (0.09 to 1896.57) | 3.92 (2.63 to 5.85)        | 3.26 (0.00 to >1000)   | 0.72                           |
| TNF-a                 | 13.15 (0.08 to 2052.62) | 2.09 (1.49 to 2.92)        | 6.30 (0.00 to >1000)   | 0.61                           |
| IL-10                 | 1.65 (0.62 to 4.41)     | 3.12 (2.16 to 4.50)        | 0.53 (0.01 to 29.99)   | 0.41                           |
| MCP-1                 | 1.97 (0.27 to 14.58)    | 1.97 (1.73 to 2.26)        | 1.00 (0.00 to >1000)   | 0.99                           |
| MIP1-b                | 1.84 (0.52 to 6.45)     | 1.63 (1.46 to 1.81)        | 1.13 (0.00 to >1000)   | 0.88                           |
|                       | <b>SWEATS (n=2)</b>     | <b>NO SWEATS (n=113)</b>   |                        |                                |
| <b>Signature</b>      | 0.36 (-0.89 to 1.60)    | -0.14 (-0.32 to 0.05)      | 0.49 (-6.86 to 7.85)   | 0.58                           |
| IL1-RA                | 6.86 (0.97 to 48.39)    | 3.66 (2.86 to 4.67)        | 1.88 (0.00 to >1000)   | 0.64                           |
| IL-6                  | 11.66 (0.17 to 818.01)  | 3.93 (2.63 to 5.87)        | 2.97 (0.00 to >1000)   | 0.70                           |
| TNF-a                 | 4.64 (0.23 to 94.22)    | 2.13 (1.51 to 2.99)        | 2.18 (0.00 to >1000)   | 0.70                           |
| IL-10                 | 6.98 (0.81 to 60.44)    | 3.04 (2.11 to 4.38)        | 2.30 (0.00 to >1000)   | 0.59                           |
| MCP-1                 | 2.32 (1.09 to 4.96)     | 1.97 (1.72 to 2.25)        | 1.18 (0.02 to 90.49)   | 0.74                           |
| MIP1-b                | 1.62 (0.95 to 2.76)     | 1.63 (1.46 to 1.82)        | 0.99 (0.05 to 19.04)   | 0.98                           |
|                       | <b>NAUSEA (n=21)</b>    | <b>NO NAUSEA (n=94)</b>    |                        |                                |
| <b>Signature</b>      | 0.09 (-0.42 to 0.60)    | -0.18 (-0.37 to 0.02)      | 0.27 (-0.32 to 0.85)   | 0.36                           |
| IL1-RA                | 5.77 (3.05 to 10.90)    | 3.36 (2.59 to 4.35)        | 1.72 (0.84 to 3.53)    | 0.14                           |
| IL-6                  | 4.70 (1.47 to 15.00)    | 3.87 (2.55 to 5.87)        | 1.21 (0.33 to 4.45)    | 0.76                           |
| TNF-a                 | 1.73 (0.85 to 3.53)     | 2.26 (1.54 to 3.32)        | 0.76 (0.33 to 1.77)    | 0.52                           |
| IL-10                 | 3.92 (1.28 to 12.02)    | 2.93 (2.03 to 4.23)        | 1.34 (0.39 to 4.64)    | 0.63                           |
| MCP-1                 | 2.61 (1.80 to 3.80)     | 1.86 (1.62 to 2.13)        | 1.40 (0.92 to 2.14)    | 0.11                           |
| MIP1-b                | 1.87 (1.33 to 2.64)     | 1.58 (1.42 to 1.76)        | 1.18 (0.81 to 1.73)    | 0.37                           |
|                       | <b>DIARRHEA (n=3)</b>   | <b>NO DIARRHEA (n=112)</b> |                        |                                |
| <b>Signature</b>      | -1.34 (-3.54 to 0.86)   | -0.10 (-0.27 to 0.08)      | -1.24 (-6.03 to 3.54)  | 0.38                           |
| IL1-RA                | 1.13 (0.08 to 15.88)    | 3.82 (3.01 to 4.85)        | 0.29 (0.00 to 91.21)   | 0.46                           |
| IL-6                  | 0.39 (0.01 to 12.84)    | 4.27 (2.88 to 6.33)        | 0.09 (0.00 to 171.34)  | 0.31                           |
| TNF-a                 | 0.20 (0.00 to 9.57)     | 2.30 (1.66 to 3.20)        | 0.09 (0.00 to 396.19)  | 0.34                           |
| IL-10                 | 0.38 (0.00 to 52.22)    | 3.27 (2.31 to 4.62)        | 0.12 (0.00 to >1000)   | 0.48                           |
| MCP-1                 | 1.16 (0.46 to 2.93)     | 2.00 (1.75 to 2.29)        | 0.58 (0.08 to 4.18)    | 0.37                           |
| MIP1-b                | 0.82 (0.20 to 3.31)     | 1.66 (1.50 to 1.84)        | 0.50 (0.02 to 10.26)   | 0.43                           |

|                  | <b>OTHER AE (n=62)</b> | <b>NO OTHER AE (n=53)</b> |                      |      |
|------------------|------------------------|---------------------------|----------------------|------|
| <b>Signature</b> | -0.08 (-0.36 to 0.20)  | -0.18 (-0.42 to 0.05)     | 0.10 (-0.27 to 0.48) | 0.58 |
| IL1-RA           | 3.94 (2.78 to 5.59)    | 3.44 (2.46 to 4.82)       | 1.15 (0.70 to 1.87)  | 0.58 |
| IL-6             | 4.56 (2.59 to 8.04)    | 3.46 (1.98 to 6.04)       | 1.32 (0.59 to 2.94)  | 0.50 |
| TNF-a            | 2.12 (1.24 to 3.63)    | 2.20 (1.49 to 3.25)       | 0.96 (0.49 to 1.89)  | 0.92 |
| IL-10            | 3.56 (1.99 to 6.39)    | 2.62 (1.77 to 3.87)       | 1.36 (0.67 to 2.77)  | 0.39 |
| MCP-1            | 2.01 (1.66 to 2.44)    | 1.93 (1.61 to 2.32)       | 1.04 (0.79 to 1.36)  | 0.78 |
| MIP1-b           | 1.61 (1.39 to 1.88)    | 1.65 (1.42 to 1.91)       | 0.98 (0.79 to 1.21)  | 0.85 |

†Adverse events were included if reported within 14 days of VSV-ZEBOV immunisation.

††Mean values (95%CI).

\*We report the mean difference (signature) and mean ratios (chemokines/cytokines) between participants with and without specific adverse events.

\*\*Signature: T-tests were conducted to compare the mean signature in participants with/without specific adverse events.

\*\*\*Chemokines/cytokines: *P* value for the comparison of the day 1 /day 0 ratio of plasma markers between participants with and without each adverse event. T-tests were conducted on log<sub>10</sub>-transformed data.

**Table S6. Association between the rVSV-ZEBOV plasma signature and the severity of AEs in Geneva participants.**

|                         |                        | <b>n</b> | <b>Signature, mean (95%CI)</b> | <b>p-values*</b> |
|-------------------------|------------------------|----------|--------------------------------|------------------|
| <b>Subjective fever</b> | <i>Maximal Grade 0</i> | 66       | -0.45 (-0.63 to -0.27)         | <b>&lt;0.001</b> |
|                         | <i>Maximal Grade 1</i> | 32       | 0.18 (-0.18 to 0.55)           |                  |
|                         | <i>Maximal Grade 2</i> | 13       | 0.52 (-0.22 to 1.26)           |                  |
|                         | <i>Maximal Grade 3</i> | 4        | 0.56 (-0.75 to 1.87)           |                  |
| <b>Myalgia</b>          | <i>Maximal Grade 0</i> | 58       | -0.43 (-0.63 to -0.24)         | <b>&lt;0.001</b> |
|                         | <i>Maximal Grade 1</i> | 35       | 0.07 (-0.31 to 0.45)           |                  |
|                         | <i>Maximal Grade 2</i> | 16       | 0.29 (-0.29 to 0.87)           |                  |
|                         | <i>Maximal Grade 3</i> | 6        | 0.53 (-0.16 to 1.22)           |                  |
| <b>Chills</b>           | <i>Maximal Grade 0</i> | 71       | -0.32 (-0.54 to -0.11)         | <b>&lt;0.001</b> |
|                         | <i>Maximal Grade 1</i> | 20       | -0.25 (-0.71 to 0.22)          |                  |
|                         | <i>Maximal Grade 2</i> | 18       | 0.41 (-0.04 to 0.86)           |                  |
|                         | <i>Maximal Grade 3</i> | 6        | 0.88 (0.07 to 1.69)            |                  |
| <b>Any AE</b>           | <i>Maximal Grade 0</i> | 9        | -0.70 (-1.07 to -0.34)         | <b>0.002</b>     |
|                         | <i>Maximal Grade 1</i> | 40       | -0.34 (-0.59 to -0.08)         |                  |
|                         | <i>Maximal Grade 2</i> | 48       | -0.04 (-0.32 to 0.25)          |                  |
|                         | <i>Maximal Grade 3</i> | 18       | 0.37 (-0.26 to 0.99)           |                  |

\* ANOVA

**Table S7. Ratio of GMCs for individual chemokines/cytokines in HD Geneva vaccinees.**

| Marker                  | NO FEVER                   | FEVER                       | <i>P</i> value* |
|-------------------------|----------------------------|-----------------------------|-----------------|
| <b>Objective fever</b>  |                            |                             |                 |
| IL-1Ra                  | 9.84 (7.26 to 13.32)       | 13.22 (8.34 to 20.95)       | .31             |
| IL-6                    | 12.92 (6.40 to 26.08)      | 15.25 (4.12 to 56.45)       | .83             |
| TNF $\alpha$            | 4.25 (2.44 to 7.38)        | 3.29 (1.35 to 8.05)         | .64             |
| IL-10                   | 5.66 (3.39 to 9.43)        | 13.66 (4.40 to 42.35)       | .18             |
| MCP-1                   | 3.19 (2.69 to 3.79)        | 3.85 (2.75 to 5.39)         | .34             |
| MIP1- $\beta$           | 2.34 (2.06 to 2.67)        | 2.23 (1.73 to 2.87)         | .73             |
| <b>Subjective fever</b> |                            |                             |                 |
| IL-1Ra                  | 7.64 (5.14 to 11.35)       | 12.69 (9.24 to 17.42)       | .057            |
| IL-6                    | 8.29 (3.44 to 19.94)       | 17.57 (7.78 to 39.68)       | .23             |
| TNF $\alpha$            | 2.53 (1.38 to 4.62)        | 5.10 (2.71 to 9.60)         | .12             |
| IL-10                   | 4.39 (2.20 to 8.78)        | 9.19 (4.87 to 17.33)        | .13             |
| MCP-1                   | 2.97 (2.38 to 3.70)        | 3.58 (2.92 to 4.39)         | .23             |
| MIP1- $\beta$           | 2.26 (1.91 to 2.66)        | 2.34 (2.01 to 2.74)         | .75             |
| <b>NO PAIN</b>          |                            |                             |                 |
| IL-1Ra                  | 11.32 (7.10 to 18.06)      | 10.40 (7.67 to 14.09)       | .76             |
| IL-6                    | 23.89 (7.52 to 75.86)      | 11.30 (5.51 to 23.19)       | .29             |
| TNF $\alpha$            | 3.83 (1.43 to 10.31)       | 4.03 (2.35 to 6.89)         | .93             |
| IL-10                   | 4.92 (1.99 to 12.17)       | 7.92 (4.48 to 13.99)        | .39             |
| MCP-1                   | 2.91 (2.26 to 3.73)        | 3.50 (2.91 to 4.21)         | .26             |
| MIP1- $\beta$           | 2.05 (1.69 to 2.50)        | 2.40 (2.09 to 2.75)         | .22             |
| <b>NO MYALGIA</b>       |                            |                             |                 |
| IL-1Ra                  | 9.35 (5.92 to 14.77)       | 11.30 (8.29 to 15.39)       | .51             |
| IL-6                    | 9.53 (4.03 to 22.49)       | 16.02 (7.08 to 36.30)       | .40             |
| TNF $\alpha$            | <b>1.89 (1.41 to 2.53)</b> | <b>5.78 (3.00 to 11.10)</b> | <b>.004</b>     |
| IL-10                   | 6.59 (2.87 to 15.09)       | 7.34 (4.01 to 13.43)        | .84             |
| MCP-1                   | 3.17 (2.48 to 4.07)        | 3.44 (2.83 to 4.19)         | .62             |
| MIP1- $\beta$           | 2.37 (1.97 to 2.86)        | 2.28 (1.97 to 2.65)         | .75             |
| <b>NO CHILLS</b>        |                            |                             |                 |
| IL-1Ra                  | 9.53 (7.06 to 12.87)       | 11.66 (7.80 to 17.45)       | .44             |
| IL-6                    | 16.92 (7.28 to 39.28)      | 11.01 (4.50 to 26.93)       | .50             |
| TNF $\alpha$            | 2.90 (1.64 to 5.13)        | 5.28 (2.58 to 10.78)        | .21             |
| IL-10                   | 4.76 (2.51 to 9.01)        | 10.09 (5.01 to 20.30)       | .13             |

|               |                             |                            |                 |
|---------------|-----------------------------|----------------------------|-----------------|
| MCP-1         | 3.12 (2.59 to 3.78)         | 3.56 (2.81 to 4.51)        | .41             |
| MIP1- $\beta$ | 2.34 (1.99 to 2.76)         | 2.29 (1.94 to 2.70)        | .83             |
|               | <b>NO ARTHRALGIA</b>        | <b>ARTHRALGIA</b>          | <b>P value*</b> |
| IL-1Ra        | 10.60 (7.87 to 14.27)       | 10.63 (6.90 to 16.36)      | .99             |
| IL-6          | 15.21 (7.47 to 30.97)       | 7.65 (2.70 to 21.73)       | .30             |
| TNF $\alpha$  | 4.09 (2.36 to 7.09)         | 3.49 (1.71 to 7.12)        | .73             |
| <b>IL-10</b>  | <b>8.56 (4.89 to 14.97)</b> | <b>2.92 (1.62 to 5.28)</b> | <b>.016</b>     |
| MCP-1         | 3.38 (2.81 to 4.06)         | 3.23 (2.87 to 3.65)        | .71             |
| MIP1- $\beta$ | 2.37 (1.97 to 2.86)         | 2.28 (1.97 to 2.65)        | .75             |
|               | <b>NO FATIGUE</b>           | <b>FATIGUE</b>             | <b>P value*</b> |
| IL-1Ra        | 9.01 (5.96 to 13.62)        | 11.78 (8.52 to 16.29)      | .32             |
| IL-6          | 7.69 (3.53 to 16.77)        | 19.35 (8.17 to 45.84)      | .13             |
| TNF $\alpha$  | 2.30 (1.62 to 3.28)         | 5.66 (2.78 to 11.54)       | <b>.032</b>     |
| IL-10         | 7.11 (3.48 to 14.52)        | 7.06 (3.66 to 13.63)       | .99             |
| MCP-1         | 2.95 (2.44 to 3.56)         | 3.64 (2.92 to 4.53)        | .16             |
| MIP1- $\beta$ | 2.01 (1.71 to 2.37)         | 2.53 (2.17 to 2.94)        | .052            |
|               | <b>NO HEADACHE</b>          | <b>HEADACHE</b>            | <b>P value*</b> |
| IL-1Ra        | 8.18 (5.44 to 12.31)        | 12.72 (9.28 to 17.43)      | .10             |
| IL-6          | 7.31 (3.24 to 16.47)        | 20.67 (8.8 to 48.55)       | .090            |
| TNF $\alpha$  | 2.20 (1.78 to 2.72)         | 6.03 (2.85 to 12.77)       | <b>.016</b>     |
| IL-10         | 8.84 (4.23 to 18.45)        | 6.06 (3.18 to 11.56)       | .45             |
| MCP-1         | 3.20 (2.57 to 3.99)         | 3.46 (2.79 to 4.28)        | .63             |
| MIP1- $\beta$ | 2.30 (1.94 to 2.71)         | 2.33 (1.98 to 2.73)        | .91             |

\*T-test on log<sub>10</sub>-transformed ratios

**Table S8. Fold change in gene expression levels (compared to day 0) for cytokines and chemokines comprising the plasma signature in Geneva participants.**

|                                          | Days | Placebo     |                | Low dose    |                 | High dose   |                  |
|------------------------------------------|------|-------------|----------------|-------------|-----------------|-------------|------------------|
|                                          |      | Fold change | <i>P</i> value | Fold change | <i>P</i> value  | Fold change | <i>P</i> value   |
| <i>IL-1RN (IL-1R<math>\alpha</math>)</i> | 0    | 1           |                | 1           |                 | 1           |                  |
|                                          | 1    | 1.27        | .11            | 2.00        | <b>&lt;.001</b> | 10.75       | <b>&lt;.001</b>  |
| <i>IL-6</i>                              | 0    | 1           |                | 1           |                 | 1           |                  |
|                                          | 1    | 0.68        | .27            | 0.78        | .20             | 0.86        | <b>.004*</b>     |
| <i>TNF<math>\alpha</math></i>            | 0    | 1           |                | 1           |                 | 1           |                  |
|                                          | 1    | 1.02        | .49            | 1.07        | .077            | 1.35        | <b>&lt;.001*</b> |
| <i>IL-10</i>                             | 0    | 1           |                | 1           |                 | 1           |                  |
|                                          | 1    | 0.89        | .14            | 0.99        | .99             | 1.04        | .59              |
| <i>MCP-1</i>                             | 0    | 1           |                | 1           |                 | 1           |                  |
|                                          | 1    | 0.98        | .51            | 6.08        | <b>&lt;.001</b> | 16.14       | <b>&lt;.001</b>  |
| <i>MIP1-<math>\beta</math></i>           | 0    | 1           |                | 1           |                 | 1           |                  |
|                                          | 1    | 0.98        | .88            | 1.17        | <b>.044*</b>    | 1.04        | .23              |

\* Indicates markers that are differentially expressed between day 0 and day 1 but for which the fold change does not reach the cutoff of  $\geq 2.0$ .



**Table S9. GMCs of up-regulated plasma markers in Lambaréné.**

| Markers*                        | Low dose (3x10 <sup>5</sup> pfu) |                 |                          | High dose (3x10 <sup>6</sup> or 2x10 <sup>7</sup> pfu) |                           | P values**      |
|---------------------------------|----------------------------------|-----------------|--------------------------|--------------------------------------------------------|---------------------------|-----------------|
|                                 | Days                             | N               | GMC (95%CI)              | N                                                      | GMC (95%CI)               | LD vs HD        |
| <i>IL-1R<math>\alpha</math></i> | 0                                | 14              | 395.2 (284.8 to 548.4)   | 51                                                     | 632.7 (513.9 to 779.0)    | <b>.026</b>     |
|                                 | 1                                | 17              | 777.2 (579.3 to 1042.8)  | 52                                                     | 8013.2 (6530.9 to 9832.0) | <b>&lt;.001</b> |
|                                 | 2                                | 16              | 1036.3 (792.2 to 1355.5) | 54                                                     | 2151.9 (1876.5 to 2467.8) | <b>&lt;.001</b> |
|                                 | 7                                | 11              | 453.2 (303.3 to 677.0)   | 50                                                     | 598.8 (463.8 to 773.2)    | .27             |
|                                 | <i>p</i> *                       | <b>&lt;.001</b> |                          | <b>&lt;.001</b>                                        |                           |                 |
| <i>IL-6</i>                     | 0                                | 14              | 0.18 (0.04 to 0.80)      | 51                                                     | 0.34 (0.18 to 0.61)       | .46             |
|                                 | 1                                | 17              | 0.32 (0.12 to 0.87)      | 52                                                     | 3.10 (2.60 to 3.69)       | <b>&lt;.001</b> |
|                                 | 2                                | 16              | 0.24 (0.07 to 0.89)      | 54                                                     | 0.62 (0.39 to 0.99)       | .20             |
|                                 | 7                                | 11              | 0.13 (0.03 to 0.60)      | 49                                                     | 0.34 (0.18 to 0.62)       | .28             |
|                                 | <i>p</i> *                       | .75             |                          | <b>&lt;.001</b>                                        |                           |                 |
| <i>TNF<math>\alpha</math></i>   | 0                                | 14              | 4.04 (3.19 to 5.11)      | 51                                                     | 3.91 (3.21 to 4.77)       | .84             |
|                                 | 1                                | 17              | 3.86 (3.13 to 4.76)      | 52                                                     | 5.47 (4.56 to 6.56)       | <b>.018</b>     |
|                                 | 2                                | 16              | 7.38 (4.56 to 11.96)     | 54                                                     | 6.03 (4.95 to 7.36)       | .46             |
|                                 | 7                                | 11              | 4.95 (3.94 to 6.21)      | 49                                                     | 4.25 (3.36 to 5.39)       | .37             |
|                                 | <i>p</i> *                       | <b>&lt;.001</b> |                          | <b>&lt;.001</b>                                        |                           |                 |
| <i>IL-10</i>                    | 0                                | 14              | 1.12 (0.52 to 2.38)      | 51                                                     | 1.05 (0.69 to 1.59)       | .89             |
|                                 | 1                                | 17              | 1.54 (0.87 to 2.74)      | 52                                                     | 4.86 (3.43 to 6.90)       | <b>.002</b>     |
|                                 | 2                                | 16              | 2.30 (1.19 to 4.46)      | 54                                                     | 3.00 (2.35 to 3.82)       | .47             |
|                                 | 7                                | 11              | 1.46 (0.75 to 2.86)      | 49                                                     | 1.30 (0.90 to 1.87)       | .76             |
|                                 | <i>p</i> *                       | <b>&lt;.001</b> |                          | <b>&lt;.001</b>                                        |                           |                 |
| <i>MCP-1</i>                    | 0                                | 14              | 78.1 (67.8 to 90.0)      | 51                                                     | 73.4 (64.21 to 83.9)      | .54             |
|                                 | 1                                | 17              | 102.0 (80.9 to 128.5)    | 52                                                     | 291.8 (245.74 to 346.6)   | <b>&lt;.001</b> |
|                                 | 2                                | 16              | 107.2 (84.1 to 136.7)    | 54                                                     | 120.9 (103.62 to 141.1)   | .42             |
|                                 | 7                                | 11              | 73.6 (55.9 to 96.8)      | 49                                                     | 89.9 (78.63 to 102.7)     | .22             |
|                                 | <i>p</i> *                       | <b>.010</b>     |                          | <b>&lt;.001</b>                                        |                           |                 |
| <i>MIP1-<math>\beta</math></i>  | 0                                | 14              | 54.7 (40.2 to 74.5)      | 51                                                     | 57.8 (49.1 to 67.9)       | .76             |
|                                 | 1                                | 17              | 54.9 (39.5 to 76.3)      | 52                                                     | 85.7 (75.0 to 97.8)       | <b>.023</b>     |
|                                 | 2                                | 16              | 74.2 (46.9 to 117.4)     | 54                                                     | 55.7 (48.9 to 63.5)       | .26             |
|                                 | <i>p</i> *                       | .31             |                          | <b>&lt;.001</b>                                        |                           |                 |

Analyses were performed including all vaccinees with available plasma samples (n=75).

\*Concentrations are expressed in pg/ml.

\*\*T-test on plasma markers after transformation of data (logarithm base 10).

**Table S10. Comparison of baseline GMCs in Lambaréné and Geneva participants.**

| All subjects   |    | Lambaréné              |     | Geneva                 |                 |
|----------------|----|------------------------|-----|------------------------|-----------------|
| Markers*       | N  | GMC at day 0 (95%CI)   | N   | GMC at day 0 (95%CI)   | P values        |
| IL-1R $\alpha$ | 65 | 571.7 (476.1 to 686.5) | 115 | 525.8 (471.0 to 586.8) | .44             |
| IL-6           | 65 | 0.29 (0.17 to 0.52)    | 115 | 0.18 (0.12 to 0.28)    | .20             |
| TNF $\alpha$   | 65 | 3.94 (3.35 to 4.63)    | 115 | 0.26 (0.17 to 0.41)    | <b>&lt;.001</b> |
| IL-10          | 65 | 1.06 (0.74 to 1.53)    | 115 | 0.09 (0.06 to 0.12)    | <b>&lt;.001</b> |
| MCP-1          | 65 | 74.4 (66.7 to 83.0)    | 115 | 171.6 (160.1 to 183.8) | <b>&lt;.001</b> |
| MIP1- $\beta$  | 65 | 57.1 (49.5 to 65.8)    | 115 | 33.7 (29.7 to 38.2)    | <b>&lt;.001</b> |

\* Concentrations are expressed in pg/ml

**Table S11. Daily ratio of GMCs (compared to day 0) for up-regulated plasma cytokines and chemokines in Lambaréné vaccinees.**

| Markers        | Day | Low dose ( $3 \times 10^5$ pfu) |                      |                 | High dose ( $3 \times 10^6$ or $2 \times 10^7$ pfu) |                        |                  | P LD vs HD      |
|----------------|-----|---------------------------------|----------------------|-----------------|-----------------------------------------------------|------------------------|------------------|-----------------|
|                |     | N                               | GMC (95%CI)          | P value         | N                                                   | GMC (95%CI)            | P value          |                 |
| IL-1R $\alpha$ | 1   | 12                              | 2.62 (1.64 to 4.19)  | <b>.002</b>     | 48                                                  | 12.91 (10.07 to 16.55) | <b>&lt;.001</b>  | <b>&lt;.001</b> |
|                | 2   | 11                              | 2.84 (1.74 to 4.63)  | <b>.002</b>     | 50                                                  | 3.28 (2.60 to 4.13)    | <b>&lt;.001</b>  | .61             |
|                | 7   | 11                              | 1.11 (0.74 to 1.67)  | .61             | 46                                                  | 0.96 (0.71 to 1.30)    | .80              | .57             |
| IL-6           | 1   | 12                              | 2.02 (0.36 to 11.23) | .44             | 48                                                  | 8.02 (4.59 to 14.01)   | <b>&lt;.001</b>  | .16             |
|                | 2   | 11                              | 0.50 (0.09 to 2.76)  | .44             | 50                                                  | 1.98 (1.23 to 3.20)    | <b>.007</b>      | .16             |
|                | 7   | 11                              | 0.49 (0.09 to 2.77)  | .44             | 45                                                  | 0.90 (0.53 to 1.52)    | .69              | .52             |
| TNF $\alpha$   | 1   | 12                              | 1.06 (0.96 to 1.17)  | .27             | 48                                                  | 1.44 (1.27 to 1.63)    | <b>&lt;.001</b>  | <b>&lt;.001</b> |
|                | 2   | 11                              | 1.55 (1.36 to 1.76)  | <b>&lt;.001</b> | 50                                                  | 1.66 (1.49 to 1.84)    | <b>&lt;.001</b>  | .41             |
|                | 7   | 11                              | 1.07 (0.94 to 1.22)  | .35             | 45                                                  | 1.17 (1.02 to 1.34)    | <b>.027</b>      | .35             |
| IL-10          | 1   | 12                              | 1.80 (1.16 to 2.80)  | <b>.024</b>     | 48                                                  | 4.47 (2.64 to 7.55)    | <b>&lt;.0001</b> | <b>.013</b>     |
|                | 2   | 11                              | 1.55 (1.17 to 2.06)  | <b>.013</b>     | 50                                                  | 2.88 (2.04 to 4.06)    | <b>&lt;.0001</b> | <b>.009</b>     |
|                | 7   | 11                              | 0.87 (0.62 to 1.24)  | .47             | 45                                                  | 1.25 (0.85 to 1.84)    | .2606            | .18             |
| MCP-1          | 1   | 12                              | 1.28 (1.01 to 1.62)  | .070            | 48                                                  | 3.94 (3.38 to 4.59)    | <b>&lt;.001</b>  | <b>&lt;.001</b> |
|                | 2   | 11                              | 1.21 (0.96 to 1.53)  | .15             | 50                                                  | 1.66 (1.49 to 1.86)    | <b>&lt;.001</b>  | <b>.031</b>     |
|                | 7   | 11                              | 0.93 (0.72 to 1.19)  | .57             | 45                                                  | 1.23 (1.08 to 1.39)    | <b>.003</b>      | <b>.070</b>     |
| MIP1- $\beta$  | 1   | 12                              | 1.02 (0.72 to 1.45)  | .91             | 48                                                  | 1.53 (1.34 to 1.74)    | <b>&lt;.001</b>  | .055            |
|                | 2   | 11                              | 0.99 (0.68 to 1.43)  | .94             | 50                                                  | 0.97 (0.84 to 1.13)    | .72              | .95             |

**Table S12. Plasma cytokines and chemokines with no significant biological change after rVSV-ZEBOV immunization in Lambaréné.**

|                | Day            | N  | Low dose (3x10 <sup>5</sup> pfu) | High dose (3x10 <sup>6</sup> or 2x10 <sup>7</sup> pfu) |                              | P      |
|----------------|----------------|----|----------------------------------|--------------------------------------------------------|------------------------------|--------|
|                |                |    | GMC (95%CI)                      | N                                                      | GMC (95%CI)                  |        |
| MIP1- $\alpha$ | 0              | 14 | 0.02 (0.00 to 0.12)              | 51                                                     | 0.08 (0.03 to 0.23)          | .25    |
|                | 1              | 17 | 0.06 (0.01 to 0.48)              | 52                                                     | 0.09 (0.03 to 0.26)          | .78    |
|                | 2              | 16 | 0.04 (0.01 to 0.20)              | 54                                                     | 0.08 (0.03 to 0.23)          | .44    |
|                | 7              | 11 | 0.07 (0.01 to 0.83)              | 49                                                     | 0.06 (0.02 to 0.16)          | .92    |
|                | <i>P</i> value |    | .42                              | <b>.025</b>                                            |                              |        |
| CXCL5          | 0              | 14 | 3183.32 (1883.49 to 5380.17)     | 51                                                     | 3418.01 (2785.68 to 4193.87) | .81    |
|                | 1              | 17 | 2779.90 (1834.31 to 4212.96)     | 52                                                     | 2755.81 (2247.63 to 3378.87) | .97    |
|                | 2              | 16 | 2700.49 (1717.90 to 4245.10)     | 54                                                     | 2492.06 (1959.88 to 3168.75) | .76    |
|                | 7              | 11 | 1803.76 (1216.09 to 2675.40)     | 49                                                     | 2329.54 (1934.38 to 2805.43) | .27    |
|                | <i>P</i> value |    | .11                              | <b>.002</b>                                            |                              |        |
| IL-8           | 0              | 14 | 1.74 (0.51 to 5.96)              | 51                                                     | 5.66 (4.57 to 7.00)          | .086   |
|                | 1              | 17 | 0.84 (0.28 to 2.49)              | 52                                                     | 3.91 (2.86 to 5.35)          | .015   |
|                | 2              | 16 | 1.37 (0.37 to 5.10)              | 54                                                     | 6.29 (4.95 to 8.00)          | .040   |
|                | 7              | 11 | 0.78 (0.19 to 3.22)              | 49                                                     | 6.53 (5.23 to 8.16)          | .015   |
|                | <i>P</i> value |    | .55                              | <b>&lt;.001</b>                                        |                              |        |
| G-CSF          | 0              | 14 | 15.28 (11.04 to 21.13)           | 51                                                     | 12.53 (9.08 to 17.29)        | 0.4004 |
|                | 1              | 17 | 13.28 (10.84 to 16.28)           | 52                                                     | 15.56 (13.56 to 17.85)       | 0.2151 |
|                | 2              | 16 | 16.86 (14.21 to 20.01)           | 54                                                     | 15.51 (12.55 to 19.18)       | 0.5518 |
|                | 7              | 11 | 25.07 (18.29 to 34.37)           | 49                                                     | 18.74 (15.80 to 22.22)       | 0.1304 |
|                | <i>P</i> value |    | <b>.004</b>                      | <b>.038</b>                                            |                              |        |

\* IFN- $\gamma$ , IL1- $\beta$ , IL-2, IL-4, IL-17 and GM-CSF remained below detection levels in all samples at all time points and are not depicted.

\*\* Missing samples might contribute to statistically significant changes over time, but no marker exhibited significant changes compared to day 0.

**Table S13. Comparison of vaccine responses (day 1/day 0 ratios) between Geneva and Lambaréné vaccinees.**

| Markers          | Lambaréné      |                      | Geneva                 |                      | P values              |                 |
|------------------|----------------|----------------------|------------------------|----------------------|-----------------------|-----------------|
|                  | N              | GMC at day 0 (95%CI) | N                      | GMC at day 0 (95%CI) |                       |                 |
| <b>High dose</b> | IL-1R $\alpha$ | 48                   | 12.91 (10.07 to 16.55) | 51                   | 10.61 (8.41 to 13.37) | .28             |
|                  | IL-6           | 48                   | 8.02 (4.59 to 14.01)   | 51                   | 13.48 (8.29 to 21.91) | .22             |
|                  | TNF $\alpha$   | 48                   | 1.44 (1.27 to 1.63)    | 51                   | 3.98 (2.43 to 6.51)   | <b>.001</b>     |
|                  | IL-10          | 48                   | 4.47 (2.64 to 7.55)    | 51                   | 7.08 (4.68 to 10.70)  | .21             |
|                  | MCP-1          | 48                   | 3.94 (3.38 to 4.59)    | 51                   | 3.35 (2.97 to 3.78)   | .15             |
|                  | MIP1- $\beta$  | 48                   | 1.53 (1.34 to 1.74)    | 51                   | 2.31 (2.09 to 2.56)   | <b>&lt;.001</b> |
| <b>Low dose</b>  | IL-1R $\alpha$ | 12                   | 2.62 (1.64 to 4.19)    | 51                   | 1.77 (1.39 to 2.26)   | .17             |
|                  | IL-6           | 12                   | 2.02 (0.36 to 11.23)   | 51                   | 1.82 (1.18 to 2.79)   | .90             |
|                  | TNF $\alpha$   | 12                   | 1.06 (0.96 to 1.17)    | 51                   | 1.33 (0.78 to 2.27)   | .47             |
|                  | IL-10          | 12                   | 1.80 (1.16 to 2.80)    | 51                   | 2.11 (1.19 to 3.75)   | .88             |
|                  | MCP-1          | 12                   | 1.28 (1.01 to 1.62)    | 51                   | 1.40 (1.22 to 1.62)   | .52             |
|                  | MIP1- $\beta$  | 12                   | 1.02 (0.72 to 1.45)    | 49                   | 1.53 (1.34 to 1.74)   | .24             |

**Table S14. Correlations between signatures and biological outcomes in Lambaréné vaccinees.**

Spearman's correlation coefficients between the Geneva/Lambaréné signature and biological outcomes:

- Peak VSV:  $\rho=0.36$  ( $P=.006$ )
- VSV Day 1:  $\rho=0.42$  ( $P=.002$ )
- VSV Day 2:  $\rho=0.34$  ( $P=.011$ )
- Lymphopenia Day 1:  $\rho=-0.50$  ( $P<.001$ )
- Lymphopenia Day 2:  $\rho=-0.12$  ( $P=.37$ )
- Thrombocytopenia Day 1:  $\rho=-0.13$  ( $P=.32$ )
- Thrombocytopenia Day 2:  $\rho=-0.12$  ( $P=.38$ )
- Neutropenia Day 1:  $\rho=0.35$  ( $P=.014$ )
- Neutropenia Day 2:  $\rho=0.04$  ( $P=.80$ )
- Monocytosis Day 1:  $\rho=0.18$  ( $P=.17$ )
- Monocytosis Day 2:  $\rho=0.12$  ( $P=.35$ )

**Table S15. Comparative frequencies of AEs in Geneva and Lambaréné vaccinees.**

|                             | Geneva          |                  | Lambaréné       |                  | P values*                  |                            |
|-----------------------------|-----------------|------------------|-----------------|------------------|----------------------------|----------------------------|
|                             | Low-dose (n=51) | High-dose (n=51) | Low-dose (n=20) | High-dose (n=55) | Geneva LD vs. Lambaréné LD | Geneva HD vs. Lambaréné HD |
| <b>Pain (%)</b>             | 11 (22)         | 38 (75)          | 3 (15)          | 31 (56)          | .74                        | .067                       |
| <b>Objective fever (%)</b>  | 1 (2)           | 13 (25)          | 1 (5)           | 10 (18)          | .49                        | .48                        |
| <b>Subjective fever (%)</b> | 12 (24)         | 32 (63)          | 1 (5)           | 18 (33)          | .093                       | <b>.003</b>                |
| <b>Chills (%)</b>           | 15 (30)         | 27 (54)          | 0 (0)           | 4 (7)            | <b>.007</b>                | <b>&lt;.001</b>            |
| <b>Myalgia (%)</b>          | 20 (39)         | 34 (67)          | 2 (10)          | 12 (22)          | <b>.022</b>                | <b>&lt;.001</b>            |
| <b>Arthralgia (%)</b>       | 7 (14)          | 8 (16)           | 2 (10)          | 17 (31)          | 1                          | .072                       |
| <b>Headaches (%)</b>        | 17 (34)         | 30 (58)          | 9 (45)          | 30 (55)          | .42                        | .70                        |
| <b>Fatigue (%)</b>          | 34 (66)         | 31 (61)          | 10 (50)         | 23 (42)          | .28                        | .055                       |

\*Fisher's exact test

LD: low dose; HD: high dose

**Table S16. Associations between the Geneva plasma signature and the severity of AEs in Lambaréné vaccinees.**

|                             |                        | <b>n</b> | <b>Signature, mean<br/>(95%CI)</b> | <b>P values*</b> |
|-----------------------------|------------------------|----------|------------------------------------|------------------|
| <b>Subjective<br/>fever</b> | <i>Maximal grade 0</i> | 43       | 0.31 (0.09 to 0.52)                | .47              |
|                             | <i>Maximal grade 1</i> | 15       | 0.57 (0.22 to 0.91)                |                  |
|                             | <i>Maximal grade 2</i> | 2        | 0.37 (0.25 to 0.49)                |                  |
|                             | <i>Maximal grade 3</i> | 0        | /                                  |                  |
| <b>Myalgia</b>              | <i>Maximal grade 0</i> | 48       | 0.33 (0.12 to 0.54)                | .29              |
|                             | <i>Maximal grade 1</i> | 9        | 0.69 (0.44 to 0.94)                |                  |
|                             | <i>Maximal grade 2</i> | 3        | 0.11 (-0.66 to 0.88)               |                  |
|                             | <i>Maximal grade 3</i> | 0        | /                                  |                  |
| <b>Chills</b>               | <i>Maximal grade 0</i> | 56       | 0.34 (0.16 to 0.52)                | .15              |
|                             | <i>Maximal grade 1</i> | 4        | 0.86 (0.27 to 1.46)                |                  |
|                             | <i>Maximal grade 2</i> | 0        | /                                  |                  |
|                             | <i>Maximal grade 3</i> | 0        | /                                  |                  |
| <b>Any AE</b>               | <i>Maximal grade 0</i> | 20       | -0.06 (-0.35 to 0.24)              | <b>.001</b>      |
|                             | <i>Maximal grade 1</i> | 32       | 0.64 (0.43 to 0.85)                |                  |
|                             | <i>Maximal grade 2</i> | 8        | 0.40 (-0.04 to 0.84)               |                  |
|                             | <i>Maximal grade 3</i> | 0        |                                    |                  |
